# Supplementary material
Source: PubMed Central journal article supplement (PMC10992610)
Supplement: 262_2021_2879_MOESM4_ESM.pdf [file 262_2021_2879_MOESM4_ESM.pdf]

**Supplementary Table 1**

| Gene           | log2 fold change | FDR <i>P</i> value | Gene      | log2 fold change | FDR <i>P</i> value |
|----------------|------------------|--------------------|-----------|------------------|--------------------|
| TPPP3          | 4.197426995      | 1.88E-02           | SLITRK1   | -3.72781887      | 1.49E-02           |
| AC011462.1     | 3.961167125      | 2.44E-02           | PAGE1     | -3.727008449     | 5.76E-03           |
| EEF1E1-BLOC1S5 | 3.917524841      | 1.42E-02           | HS3ST5    | -3.714691237     | 5.44E-03           |
| FOXH1          | 3.831039929      | 1.49E-02           | POTEC     | -3.710692466     | 6.58E-05           |
| MYOM2          | 3.814673057      | 1.83E-02           | SYT4      | -3.707993031     | 2.81E-02           |
| HIST1H2AD      | 3.59259881       | 5.75E-03           | RPTN      | -3.696352189     | 1.41E-04           |
| FSCN1          | 3.454846041      | 2.42E-02           | FGA       | -3.695158569     | 2.60E-05           |
| CYGB           | 3.431886797      | 3.41E-02           | HSFY1     | -3.68908496      | 3.59E-02           |
| AC011452.2     | 3.236418793      | 1.64E-02           | KRT6A     | -3.665687132     | 2.72E-03           |
| IGSF9          | 3.115311225      | 1.03E-02           | IFNA4     | -3.6644516       | 4.97E-02           |
| PHLDA2         | 3.021206009      | 6.98E-03           | RFPL4AL1  | -3.630948991     | 5.97E-03           |
| MYBPC2         | 2.981840635      | 4.61E-02           | OR4D10    | -3.61659217      | 4.12E-03           |
| PSORS1C1       | 2.818304748      | 3.79E-02           | SPATA31D3 | -3.612413327     | 3.41E-03           |
| PANK1          | 2.802544885      | 1.98E-02           | GYPB      | -3.605150674     | 3.10E-02           |
| HIST1H2BO      | 2.730128445      | 4.19E-03           | CT45A5    | -3.602945693     | 1.33E-02           |
| HSPA6          | 2.726492764      | 3.30E-03           | NPY1R     | -3.571919248     | 1.49E-02           |
| FXD2           | 2.725484448      | 1.07E-04           | MYL2      | -3.560794827     | 6.38E-03           |
| HBA1           | 2.709679939      | 6.31E-04           | OR52N2    | -3.540757464     | 1.38E-02           |
| PEAK3          | 2.562601043      | 3.59E-02           | PRL       | -3.527743289     | 1.27E-02           |
| HIST1H3I       | 2.497146564      | 1.82E-03           | CHRM2     | -3.518298802     | 2.72E-03           |
| FGFBP2         | 2.46290405       | 4.12E-03           | DUOX2     | -3.501612258     | 5.09E-03           |
| HSPA1A         | 2.450703969      | 6.98E-03           | TRIM49B   | -3.501375591     | 1.18E-05           |
| GPR141         | 2.388509182      | 4.96E-02           | PRAMEF15  | -3.49081866      | 3.01E-03           |
| HIST2H2AB      | 2.361692631      | 1.14E-02           | MYH2      | -3.486691273     | 5.22E-09           |
| H2AFX          | 2.355853294      | 1.49E-03           | CALCRL    | -3.480381815     | 6.16E-03           |
| GCHFR          | 2.329714908      | 4.07E-03           | PSG1      | -3.437969542     | 3.01E-02           |
| RIMS3          | 2.262027915      | 1.43E-04           | CSNK1A1L  | -3.434329619     | 4.25E-02           |
| CATSPER1       | 2.250983091      | 3.99E-02           | AICDA     | -3.424202324     | 5.52E-03           |
| AL121845.3     | 2.232891655      | 6.09E-03           | EPGN      | -3.414740471     | 1.99E-02           |
| HIST1H3F       | 2.216586131      | 2.85E-02           | EMX2      | -3.393279653     | 4.82E-02           |
| LGALS1         | 2.188975151      | 1.06E-06           | NDNF      | -3.382733142     | 1.26E-02           |
| BBC3           | 2.18459262       | 1.48E-02           | NEFL      | -3.326194441     | 1.74E-03           |
| HILPDA         | 2.172906682      | 1.93E-02           | AMY1C     | -3.324616482     | 2.08E-02           |
| HIST1H2BM      | 2.165116039      | 3.84E-02           | KRT6C     | -3.312918259     | 2.36E-02           |
| HIST1H2BB      | 2.123431504      | 1.28E-02           | SSX5      | -3.310372278     | 4.72E-02           |
| SLC2A14        | 2.107328087      | 4.58E-02           | CCDC85A   | -3.29421739      | 2.76E-02           |
| HIST1H4L       | 2.105328887      | 1.59E-02           | PDE11A    | -3.293877462     | 1.42E-02           |
| HIST1H2BJ      | 2.094711455      | 4.23E-03           | TXNDC2    | -3.255927579     | 2.30E-02           |
| CES1           | 2.086572777      | 1.49E-02           | HNRNPCL3  | -3.242355778     | 8.62E-03           |

|            |             |          |           |              |          |
|------------|-------------|----------|-----------|--------------|----------|
| KLF2       | 2.072401514 | 1.62E-03 | MMP13     | -3.24233104  | 2.71E-03 |
| ADAMTSL5   | 2.070630302 | 4.19E-02 | OR10K1    | -3.236162926 | 9.99E-03 |
| LSM7       | 2.044729088 | 1.16E-03 | OMD       | -3.22677736  | 8.88E-04 |
| CAPN8      | 2.030590867 | 2.98E-02 | HHIP      | -3.208959671 | 1.43E-02 |
| HIST2H4A   | 2.005953475 | 6.36E-03 | ZNF99     | -3.207649333 | 7.91E-04 |
| RPL28      | 2.004904358 | 5.96E-05 | XAGE1A    | -3.205311165 | 1.12E-02 |
| HIST1H2BG  | 2.003266839 | 2.41E-03 | PRAMEF19  | -3.190134662 | 2.56E-02 |
| MRPL54     | 2.001463877 | 3.36E-04 | SSX7      | -3.143499668 | 4.60E-02 |
| TMEM191B   | 1.994976019 | 2.12E-06 | OR6Q1     | -3.137277365 | 4.89E-02 |
| PTGDS      | 1.981154049 | 3.06E-02 | DAW1      | -3.136803075 | 4.10E-04 |
| PXN        | 1.976412589 | 4.23E-03 | OR4F4     | -3.136521872 | 6.40E-03 |
| LMNA       | 1.949646434 | 1.50E-02 | SPATA31A7 | -3.133825764 | 5.69E-03 |
| DNAJB1     | 1.947260839 | 2.16E-02 | ZNF479    | -3.131940055 | 5.82E-05 |
| HIST2H3D   | 1.941638238 | 4.76E-03 | P2RY12    | -3.127378809 | 5.75E-03 |
| TMEM191C   | 1.940010079 | 9.88E-04 | F13B      | -3.127016397 | 7.91E-04 |
| MZT2A      | 1.925756411 | 6.92E-04 | OR10K2    | -3.125400412 | 5.00E-02 |
| RPS15      | 1.911506967 | 6.65E-04 | HBG2      | -3.116670955 | 3.97E-03 |
| C2orf92    | 1.905609194 | 4.58E-02 | POTEM     | -3.109878764 | 1.81E-04 |
| A1BG       | 1.904261503 | 2.72E-03 | STEAP1    | -3.065217704 | 1.47E-02 |
| TEX14      | 1.901420737 | 5.57E-03 | PHEX      | -3.059164876 | 1.02E-03 |
| EGR1       | 1.89598458  | 2.51E-03 | CDRT15    | -3.052013445 | 3.11E-02 |
| HIST2H2BE  | 1.883936691 | 4.20E-02 | OR4F3     | -3.037394805 | 5.90E-04 |
| UQCR11     | 1.883083136 | 6.92E-04 | ZNF716    | -3.036927829 | 7.38E-05 |
| FAM229A    | 1.867037953 | 4.58E-02 | OR4F17    | -3.031381363 | 3.75E-03 |
| HIST3H2BB  | 1.848410105 | 4.28E-03 | TRIM51GP  | -3.020690326 | 8.32E-03 |
| C11orf98   | 1.846365188 | 8.21E-03 | USP17L22  | -3.011796752 | 1.85E-04 |
| BTBD19     | 1.835706908 | 2.01E-02 | CLCA4     | -2.987791586 | 1.57E-03 |
| OSBPL5     | 1.834700609 | 1.43E-02 | USP17L25  | -2.986631879 | 2.51E-03 |
| HIST1H4H   | 1.825680115 | 8.02E-03 | OR4D11    | -2.976989887 | 1.29E-02 |
| IER2       | 1.824300269 | 2.96E-03 | MSTN      | -2.972765959 | 3.40E-02 |
| BORCS8     | 1.814390242 | 3.09E-03 | MNS1      | -2.970948687 | 1.54E-02 |
| ELOB       | 1.813536873 | 3.31E-03 | ZNF729    | -2.942873158 | 9.71E-05 |
| HIST2H2AA3 | 1.810073817 | 3.32E-03 | ADH1C     | -2.934291553 | 2.09E-02 |
| XCL2       | 1.80099794  | 2.04E-02 | GAGE2E    | -2.929302773 | 1.06E-03 |
| TIMP1      | 1.79586615  | 2.45E-02 | LRRTM3    | -2.927006632 | 3.62E-02 |
| DUSP1      | 1.791197526 | 2.97E-02 | FGF10     | -2.923809817 | 6.98E-03 |
| UQCC3      | 1.789340115 | 6.98E-03 | TRHR      | -2.923289407 | 9.92E-04 |
| TMEM160    | 1.781020201 | 5.50E-04 | MUC22     | -2.914439576 | 1.95E-02 |
| SDHAF1     | 1.776096549 | 3.14E-02 | PRAMEF18  | -2.906559787 | 2.81E-02 |
| RPS26      | 1.775078597 | 4.02E-02 | OPRPN     | -2.899569134 | 3.68E-02 |
| HIST1H2AC  | 1.77379034  | 1.83E-02 | ODAM      | -2.898900145 | 8.22E-03 |
| HIST1H3A   | 1.773429588 | 7.64E-04 | SLC7A14   | -2.894094776 | 3.66E-02 |
| HIST1H4F   | 1.772885653 | 3.51E-02 | ZNF676    | -2.891012808 | 1.16E-04 |

|            |             |          |                     |              |          |
|------------|-------------|----------|---------------------|--------------|----------|
| SF3B5      | 1.768329799 | 1.57E-03 | OVCH1               | -2.871177811 | 1.69E-03 |
| METRNL     | 1.767029084 | 1.81E-02 | DSPP                | -2.862546679 | 1.51E-04 |
| CCDC85B    | 1.766159539 | 3.88E-02 | C18orf63            | -2.846995703 | 7.38E-05 |
| MYPOP      | 1.761695011 | 4.35E-02 | BMP5                | -2.838802751 | 2.67E-04 |
| HIST1H4I   | 1.760787957 | 3.88E-02 | NXPE4               | -2.813217578 | 1.45E-02 |
| MRPL41     | 1.756457112 | 3.27E-03 | CASQ2               | -2.813197369 | 9.23E-03 |
| FAM153C    | 1.745748637 | 4.51E-02 | IL13RA2             | -2.785938559 | 3.82E-02 |
| TMEM238    | 1.743778793 | 4.91E-02 | TMEM26              | -2.783209453 | 1.87E-02 |
| TOMM7      | 1.739891117 | 9.00E-04 | CLDN16              | -2.776670673 | 7.91E-04 |
| DDIT3      | 1.728121832 | 5.49E-03 | RFX6                | -2.771423462 | 1.85E-04 |
| MRPS12     | 1.727456487 | 8.01E-04 | PRDM5               | -2.769111866 | 8.24E-05 |
| TRAPPC5    | 1.723768441 | 1.43E-03 | OCRL                | -2.763537216 | 2.76E-03 |
| CYP2F1     | 1.720223816 | 1.45E-02 | PRAMEF25            | -2.755590013 | 1.99E-02 |
| DNLZ       | 1.718273952 | 2.57E-03 | GAGE1               | -2.753989881 | 3.40E-03 |
| FAM229B    | 1.71077635  | 3.59E-02 | OR11H1              | -2.748828557 | 1.43E-03 |
| NPM2       | 1.7019092   | 4.08E-02 | SPAM1               | -2.737570828 | 3.30E-02 |
| NDUFAF8    | 1.701348873 | 2.51E-03 | KRT25               | -2.735178264 | 3.29E-02 |
| NDUFB7     | 1.700560731 | 1.97E-03 | ANGPTL3             | -2.728391241 | 4.75E-02 |
| POLR2L     | 1.700217066 | 4.76E-03 | AGXT2               | -2.725685223 | 1.57E-03 |
| IL17RC     | 1.693942539 | 1.09E-02 | GCKR                | -2.71731009  | 3.01E-02 |
| SCAND1     | 1.689921015 | 8.02E-03 | PLCZ1               | -2.711370484 | 1.06E-03 |
| DEDD2      | 1.672643529 | 4.07E-03 | PNLDC1              | -2.71012199  | 4.55E-03 |
| PTRH1      | 1.663565701 | 1.75E-03 | ANGPTL5             | -2.709566935 | 2.20E-02 |
| RPS28      | 1.662756344 | 2.76E-02 | IL22                | -2.709112318 | 3.94E-02 |
| C4orf48    | 1.660238786 | 2.67E-02 | FAM189A2            | -2.702030944 | 5.68E-03 |
| CTU1       | 1.656103073 | 2.76E-02 | FRZB                | -2.698157487 | 3.21E-02 |
| PTRHD1     | 1.653734175 | 9.00E-04 | ASIC5               | -2.696692197 | 4.70E-02 |
| HIST1H2AM  | 1.644740722 | 4.23E-03 | CSN1S1              | -2.683089043 | 9.70E-03 |
| GADD45B    | 1.644566839 | 1.49E-02 | HMGCS2              | -2.668385397 | 2.53E-02 |
| HIST1H3D   | 1.642193236 | 1.49E-02 | MAP1B               | -2.65854671  | 1.67E-03 |
| GAS7       | 1.639447364 | 4.50E-02 | USP17L26            | -2.64412078  | 4.25E-03 |
| POMC       | 1.63279584  | 3.03E-02 | GRPR                | -2.627493361 | 2.44E-02 |
| UBALD1     | 1.630892912 | 4.20E-02 | H3F3C               | -2.627087205 | 2.49E-02 |
| C19orf53   | 1.630138242 | 8.32E-04 | TRIM51              | -2.626754271 | 2.69E-03 |
| AC005258.1 | 1.627880058 | 3.72E-02 | RPE65               | -2.616438244 | 4.00E-03 |
| CD70       | 1.626619001 | 1.48E-02 | NRK                 | -2.610760905 | 6.93E-04 |
| RPL41      | 1.623413211 | 2.61E-04 | SLCO1B3-<br>SLCO1B7 | -2.608975263 | 2.16E-02 |
| TMEM229B   | 1.616916351 | 3.90E-02 | ACKR4               | -2.604310846 | 7.03E-03 |
| BMP8A      | 1.596354123 | 1.49E-02 | SSX4                | -2.596057432 | 1.76E-02 |
| S1PR1      | 1.595679018 | 3.34E-02 | DEFB107B            | -2.588249198 | 4.42E-02 |
| HIST1H2AI  | 1.595600239 | 2.76E-02 | NLRP14              | -2.581021721 | 1.31E-05 |
| HIC2       | 1.595233707 | 1.81E-02 | RRH                 | -2.579822344 | 6.26E-03 |

|            |             |          |           |              |          |
|------------|-------------|----------|-----------|--------------|----------|
| SBK1       | 1.594833805 | 1.45E-02 | LVRN      | -2.574798763 | 2.78E-03 |
| RHOB       | 1.590096025 | 2.61E-02 | POTED     | -2.574452667 | 8.02E-03 |
| MZT2B      | 1.584107371 | 2.51E-03 | ZNF735    | -2.566923983 | 1.89E-02 |
| SCD5       | 1.580263655 | 1.33E-02 | CYP7A1    | -2.562897205 | 3.25E-03 |
| ATF3       | 1.578451254 | 3.68E-02 | TMPRSS11A | -2.555610174 | 2.29E-02 |
| LRRC75A    | 1.575061402 | 5.21E-03 | XDH       | -2.553452901 | 4.10E-04 |
| ICAM2      | 1.568405613 | 2.51E-02 | CFHR4     | -2.548838273 | 3.25E-03 |
| SULT2B1    | 1.568217643 | 1.83E-02 | TAS2R43   | -2.543437929 | 3.58E-02 |
| MICALL2    | 1.563744703 | 4.97E-02 | DSP       | -2.54022306  | 5.83E-05 |
| C11orf71   | 1.563438459 | 9.90E-03 | GOLGA6L6  | -2.539469254 | 2.13E-02 |
| COMMD6     | 1.563184389 | 5.06E-03 | TBX18     | -2.532125747 | 3.99E-02 |
| SIAH2      | 1.560796936 | 1.27E-03 | ZNF679    | -2.52696052  | 1.43E-03 |
| TNFAIP8L1  | 1.55783305  | 1.18E-02 | ABCC8     | -2.520517493 | 2.72E-03 |
| H2AFJ      | 1.554320468 | 1.32E-02 | ZNF705E   | -2.512750583 | 6.45E-03 |
| HIST1H4A   | 1.552400946 | 6.83E-03 | ENAM      | -2.510379357 | 7.38E-04 |
| MICOS13    | 1.550324253 | 1.75E-03 | CCDC110   | -2.509992083 | 4.29E-02 |
| AC090227.2 | 1.550204648 | 3.28E-02 | ZNF705A   | -2.486495865 | 7.91E-04 |
| SNRPD2     | 1.549274852 | 4.52E-03 | MCHR2     | -2.477566215 | 3.15E-02 |
| IER5       | 1.549119264 | 3.04E-02 | CSN2      | -2.466256351 | 4.78E-02 |
| RNFT2      | 1.546874368 | 1.24E-02 | HEPACAM2  | -2.458586408 | 2.19E-02 |
| COX14      | 1.545973812 | 2.51E-03 | GADL1     | -2.445802533 | 3.75E-03 |
| HIST1H2AE  | 1.540860335 | 2.42E-02 | SLC7A2    | -2.433433764 | 1.42E-02 |
| S1PR5      | 1.540723871 | 4.50E-02 | OR4N2     | -2.432726434 | 1.43E-03 |
| HIST1H3J   | 1.534218848 | 1.39E-02 | GRIA2     | -2.429419007 | 6.65E-05 |
| COMTD1     | 1.529208784 | 2.71E-03 | KIAA0319  | -2.426594744 | 1.49E-02 |
| CHRNE      | 1.524103733 | 1.95E-02 | SLC6A15   | -2.425495521 | 2.71E-03 |
| SMPD3      | 1.522191551 | 5.75E-03 | GRXCR1    | -2.418916423 | 2.56E-02 |
| RFLNB      | 1.520671514 | 2.43E-02 | MYCT1     | -2.416197153 | 4.45E-02 |
| AP002990.1 | 1.520427006 | 3.72E-02 | MGAM2     | -2.406981482 | 7.86E-04 |
| AL441992.3 | 1.518515783 | 4.83E-02 | GABRA1    | -2.405964197 | 9.88E-04 |
| C6orf226   | 1.515471614 | 1.02E-02 | APOB      | -2.404875901 | 2.01E-03 |
| BLVRB      | 1.51288053  | 2.41E-03 | AMY2A     | -2.396507938 | 6.99E-04 |
| RPS19BP1   | 1.507747564 | 3.88E-03 | CCN6      | -2.393108567 | 6.98E-03 |
| FAM207A    | 1.507033424 | 3.56E-03 | ROS1      | -2.384308024 | 1.02E-03 |
| CYBA       | 1.506054614 | 8.10E-03 | OR2T29    | -2.381858157 | 3.88E-02 |
| PPP1R14B   | 1.503186929 | 2.78E-02 | KDR       | -2.380906286 | 4.55E-03 |
| BAD        | 1.50135741  | 4.98E-03 | CYP24A1   | -2.379441434 | 3.32E-02 |
| PIGBOS1    | 1.499739103 | 3.04E-02 | FSHR      | -2.378839753 | 3.10E-02 |
| HIST1H4J   | 1.498181809 | 1.51E-03 | FGF5      | -2.371966053 | 3.68E-02 |
| SMIM4      | 1.495505583 | 4.55E-03 | ANGPTL1   | -2.369482971 | 4.91E-02 |
| BEX2       | 1.493593773 | 4.57E-02 | SERPINI2  | -2.360887573 | 1.86E-02 |
| SELENOM    | 1.48872667  | 2.84E-02 | LTK       | -2.359204617 | 1.98E-02 |
| CDKN2D     | 1.486014891 | 4.81E-02 | ZNF723    | -2.358733171 | 4.75E-02 |

|            |             |          |           |              |          |
|------------|-------------|----------|-----------|--------------|----------|
| RGCC       | 1.47822494  | 3.15E-02 | OR7E24    | -2.35672216  | 5.75E-03 |
| BOLA2B     | 1.478213306 | 4.12E-03 | PRAMEF11  | -2.356198721 | 3.70E-02 |
| NDUFA13    | 1.474383043 | 4.08E-03 | TNFRSF11A | -2.355607855 | 7.06E-03 |
| TMA7       | 1.47365146  | 4.00E-03 | GOLGA8S   | -2.355384636 | 1.14E-02 |
| C1orf216   | 1.471531802 | 2.47E-02 | OR4F21    | -2.350606541 | 3.40E-02 |
| GADD45GIP1 | 1.471107578 | 7.95E-03 | GREB1     | -2.347581042 | 2.17E-02 |
| ME3        | 1.470846537 | 4.72E-02 | CCDC144A  | -2.34705144  | 5.57E-03 |
| B9D2       | 1.468897256 | 6.23E-03 | NUTM2D    | -2.34536489  | 4.23E-02 |
| CDKN2A     | 1.447277542 | 4.75E-02 | CA8       | -2.342770787 | 4.07E-03 |
| DPM3       | 1.446639755 | 1.10E-02 | TRIM64B   | -2.341303293 | 1.81E-02 |
| C1orf162   | 1.446387788 | 4.26E-02 | RNF175    | -2.332900526 | 3.84E-02 |
| ENSA       | 1.444511966 | 1.51E-04 | AMPD1     | -2.326778399 | 1.22E-02 |
| MGMT       | 1.443612328 | 4.12E-03 | CFAP69    | -2.323653537 | 9.99E-03 |
| ISG15      | 1.441838665 | 3.17E-02 | MMRN1     | -2.319953099 | 1.76E-03 |
| SPATA33    | 1.439861693 | 2.53E-03 | COL12A1   | -2.319026625 | 4.10E-04 |
| OST4       | 1.436114237 | 7.91E-04 | ZNF722P   | -2.313957132 | 2.12E-02 |
| PXMP2      | 1.435524472 | 2.44E-02 | ZNF433    | -2.305050937 | 4.55E-03 |
| ROMO1      | 1.432456671 | 2.51E-03 | EPHA7     | -2.298371263 | 2.73E-03 |
| RPS9       | 1.430456618 | 5.97E-03 | TRIM48    | -2.286095231 | 2.10E-02 |
| HIST2H2AC  | 1.424610526 | 2.65E-02 | LIPI      | -2.271486401 | 5.52E-03 |
| CITED2     | 1.42459347  | 3.28E-02 | DSG4      | -2.267581008 | 8.02E-03 |
| ZNF66      | 1.422349997 | 3.63E-02 | SCN2A     | -2.267048068 | 1.35E-04 |
| CCDC24     | 1.421102161 | 2.19E-02 | KCNU1     | -2.26683305  | 1.82E-03 |
| RPS14      | 1.415161466 | 1.97E-03 | USP17L29  | -2.262735023 | 1.70E-02 |
| ZNF428     | 1.411550595 | 1.22E-03 | NTRK2     | -2.262278067 | 1.90E-02 |
| ERVK3-1    | 1.409712025 | 2.01E-02 | ZNF730    | -2.255852456 | 1.05E-02 |
| EXOSC4     | 1.409404488 | 7.95E-03 | USP17L30  | -2.252993772 | 1.92E-02 |
| C12orf57   | 1.40773596  | 5.57E-03 | NOX4      | -2.245701744 | 4.09E-03 |
| NENF       | 1.406241231 | 1.31E-02 | B3GALNT1  | -2.242437023 | 4.95E-02 |
| SPHK2      | 1.400802292 | 2.10E-02 | PGR       | -2.238974145 | 2.97E-02 |
| ATF5       | 1.400698009 | 3.14E-02 | TMPRSS15  | -2.23605692  | 8.10E-04 |
| AP000311.1 | 1.396880073 | 4.55E-03 | ANOS1     | -2.228415833 | 2.25E-03 |
| RPS10      | 1.396860826 | 1.12E-02 | UGT2B28   | -2.225625474 | 3.60E-02 |
| SSNA1      | 1.396790945 | 1.97E-02 | CHRNA6    | -2.218085142 | 4.58E-02 |
| MRPL52     | 1.39529262  | 1.91E-02 | C8A       | -2.216738559 | 4.72E-02 |
| HIST3H2A   | 1.394703726 | 1.70E-02 | SLCO1B1   | -2.214036147 | 3.38E-03 |
| PNKD       | 1.391620601 | 1.14E-02 | USP17L27  | -2.211802277 | 2.20E-02 |
| RXRA       | 1.390210353 | 1.18E-02 | HGF       | -2.209552499 | 1.45E-02 |
| CCDC167    | 1.388445316 | 2.53E-03 | SCN9A     | -2.208366076 | 5.73E-03 |
| HIST1H4C   | 1.387075442 | 4.11E-02 | ASZ1      | -2.202693294 | 3.57E-02 |
| RIC3       | 1.383558778 | 3.07E-02 | HLA-DOB   | -2.202468715 | 2.36E-02 |
| POLR2I     | 1.38226419  | 1.33E-02 | ARHGAP29  | -2.191160857 | 4.23E-03 |
| PGP        | 1.379284297 | 1.49E-02 | SPTA1     | -2.190467027 | 1.62E-02 |

|            |             |          |          |              |          |
|------------|-------------|----------|----------|--------------|----------|
| NME3       | 1.37480996  | 3.88E-02 | CRISPLD1 | -2.189596845 | 2.73E-02 |
| SULT1A4    | 1.373794695 | 5.00E-02 | MUC12    | -2.187815841 | 1.82E-03 |
| NUDT2      | 1.370291159 | 5.33E-03 | RSPO3    | -2.186380838 | 4.98E-02 |
| CENPX      | 1.369547553 | 1.88E-02 | ADAMTS20 | -2.182859567 | 5.40E-04 |
| RAB39B     | 1.369378234 | 3.18E-02 | BLK      | -2.178606449 | 2.28E-02 |
| AC009690.1 | 1.36862488  | 3.01E-02 | CDH6     | -2.174797567 | 2.72E-02 |
| SWI5       | 1.36658289  | 7.03E-03 | DNAH12   | -2.174730281 | 4.96E-04 |
| RPS19      | 1.366101816 | 5.12E-03 | IGSF10   | -2.17169813  | 4.34E-02 |
| NCBP2-AS2  | 1.364231098 | 3.58E-02 | TDRD15   | -2.171560587 | 3.59E-02 |
| PHPT1      | 1.363800787 | 1.15E-03 | OR4K2    | -2.170171447 | 3.28E-02 |
| NOSIP      | 1.363412412 | 4.59E-03 | COL11A1  | -2.16355433  | 2.50E-05 |
| CYSTM1     | 1.36046188  | 1.81E-02 | MYPN     | -2.158473176 | 2.88E-03 |
| CRIP1      | 1.359885197 | 6.12E-03 | SCN3A    | -2.157199135 | 7.58E-03 |
| VAMP5      | 1.359349014 | 3.49E-02 | EGF      | -2.156405868 | 1.97E-03 |
| RRAS       | 1.355176889 | 4.43E-02 | KCNJ3    | -2.150642171 | 4.34E-02 |
| C7orf50    | 1.353875445 | 3.75E-03 | GOLGA6L1 | -2.147504923 | 1.27E-03 |
| LAGE3      | 1.353542854 | 1.65E-02 | TLL1     | -2.143492431 | 6.70E-04 |
| HIST1H2AJ  | 1.351407998 | 3.04E-02 | PHKA1    | -2.130642778 | 4.07E-03 |
| FBXL15     | 1.350073209 | 3.00E-02 | C6       | -2.125411119 | 1.02E-03 |
| TRAPPC6A   | 1.349700943 | 4.76E-03 | LRP2     | -2.118566286 | 1.23E-05 |
| UQCR10     | 1.349375153 | 4.07E-03 | ABCA4    | -2.118144214 | 7.23E-04 |
| ANAPC11    | 1.341642883 | 7.41E-03 | GOLGA8F  | -2.114902056 | 2.97E-02 |
| COX7A2     | 1.34095962  | 1.76E-02 | SH3TC2   | -2.114312514 | 4.93E-03 |
| PRR12      | 1.333541244 | 4.75E-02 | PTGS2    | -2.102563806 | 5.69E-03 |
| RPL13      | 1.328941284 | 1.33E-02 | PAX3     | -2.093276045 | 3.15E-02 |
| RPL23A     | 1.328443834 | 1.10E-02 | ABCB11   | -2.083997786 | 1.28E-02 |
| ZNF480     | 1.328019084 | 8.22E-03 | CACNA2D1 | -2.082719777 | 2.20E-03 |
| LRRC23     | 1.323266396 | 4.08E-03 | SYCP1    | -2.081588862 | 3.31E-03 |
| RPL35      | 1.321827014 | 2.16E-02 | ZNF705G  | -2.077035343 | 8.08E-04 |
| C19orf25   | 1.317972747 | 1.73E-02 | SLC1A3   | -2.073516588 | 4.56E-03 |
| TIMM13     | 1.316129051 | 1.07E-02 | POTEH    | -2.070822376 | 8.10E-03 |
| HIST1H2BN  | 1.31592733  | 2.04E-02 | PTPN21   | -2.070014735 | 3.02E-03 |
| AURKAIP1   | 1.314718956 | 6.12E-03 | FLT1     | -2.06916343  | 4.08E-03 |
| ZMAT5      | 1.310577337 | 2.76E-02 | GABRG2   | -2.06604792  | 1.95E-03 |
| COX6B1     | 1.310143747 | 1.56E-02 | MPP4     | -2.051324004 | 3.70E-02 |
| EFHD2      | 1.308705529 | 3.66E-02 | ADAMTS18 | -2.047701942 | 2.59E-04 |
| MRPL23     | 1.308173289 | 3.87E-02 | TUSC3    | -2.038413682 | 6.40E-04 |
| MRPL53     | 1.307955731 | 2.10E-02 | OGN      | -2.035334417 | 3.03E-02 |
| SERTAD1    | 1.307090304 | 3.67E-02 | GUCY1B1  | -2.034131356 | 1.63E-02 |
| RPS2       | 1.304023065 | 1.82E-03 | RPS6KA6  | -2.030726829 | 3.56E-02 |
| DUSP28     | 1.300460844 | 2.34E-02 | OLFM3    | -2.027865331 | 1.48E-02 |
| MCRIP2     | 1.297035095 | 4.80E-02 | ZNF462   | -2.026436711 | 4.79E-03 |
| CCDC200    | 1.292553012 | 3.14E-02 | TDRD1    | -2.024843898 | 1.23E-02 |

|             |             |          |           |              |          |
|-------------|-------------|----------|-----------|--------------|----------|
| ARIH2OS     | 1.292051077 | 2.73E-02 | NWD2      | -2.018203514 | 3.40E-02 |
| FUOM        | 1.291157453 | 4.58E-02 | ADAMTS3   | -2.016399768 | 2.72E-03 |
| NUDT1       | 1.291009683 | 7.70E-03 | FAM81B    | -2.012992841 | 3.68E-02 |
| PYCARD      | 1.2904543   | 3.59E-02 | SERINC2   | -2.007872682 | 4.70E-02 |
| RPS10-NUDT3 | 1.287326416 | 1.55E-02 | MUC7      | -2.006922683 | 4.02E-02 |
| FRMD8       | 1.285460201 | 5.75E-03 | TBX15     | -2.006851383 | 2.34E-02 |
| HOOK2       | 1.283817555 | 2.82E-02 | DSG2      | -2.001277057 | 6.22E-03 |
| NAA38       | 1.282979089 | 5.68E-03 | SLC4A10   | -1.998143907 | 2.17E-03 |
| ALKBH7      | 1.282597219 | 1.48E-02 | GAS2L3    | -1.993456108 | 3.30E-03 |
| RPL29       | 1.281985663 | 2.08E-02 | C11orf88  | -1.99171635  | 4.75E-02 |
| TUBB2A      | 1.280057943 | 2.67E-02 | POTEG     | -1.989268261 | 2.59E-04 |
| LIME1       | 1.279974849 | 3.34E-02 | SMARCA1   | -1.987355991 | 4.16E-02 |
| REX1BD      | 1.27991426  | 3.03E-02 | TRIM49    | -1.986197598 | 1.49E-02 |
| RPS21       | 1.278878458 | 3.41E-02 | PIWIL3    | -1.979294286 | 1.65E-02 |
| COA4        | 1.277467397 | 1.46E-02 | TEK       | -1.977295409 | 1.43E-03 |
| MAP2K7      | 1.276805784 | 1.05E-02 | UGT1A8    | -1.973411477 | 2.42E-02 |
| LSM10       | 1.272990139 | 1.18E-02 | ELAVL2    | -1.970819506 | 1.70E-02 |
| TNFSF14     | 1.272769339 | 1.73E-02 | CAMSAP2   | -1.967273253 | 1.27E-03 |
| RPS5        | 1.271290139 | 1.65E-02 | NR1H4     | -1.966250075 | 9.81E-03 |
| SIVA1       | 1.271008682 | 2.84E-02 | LRRIQ1    | -1.96541125  | 3.92E-03 |
| NDUFA3      | 1.268362856 | 3.81E-02 | SPATA31A3 | -1.960741813 | 3.68E-02 |
| CBX6        | 1.267669433 | 2.16E-02 | HCRTR2    | -1.956358157 | 1.38E-02 |
| TMSB10      | 1.26705712  | 4.97E-03 | ABCC9     | -1.955065187 | 4.31E-03 |
| ENDOG       | 1.266901465 | 1.49E-02 | IL26      | -1.953230018 | 1.70E-02 |
| DGCR6L      | 1.26675237  | 3.57E-02 | SLC12A1   | -1.951177673 | 1.57E-03 |
| MYADM       | 1.262778296 | 3.99E-02 | FSIP2     | -1.946748579 | 9.31E-03 |
| CISD3       | 1.260374488 | 9.32E-03 | NPIPA7    | -1.945390716 | 3.36E-02 |
| RPS16       | 1.260278409 | 3.71E-03 | OTOGL     | -1.936946466 | 2.93E-03 |
| CTNNBIP1    | 1.25868019  | 3.99E-02 | USP17L24  | -1.933748406 | 4.87E-02 |
| RPL36       | 1.258482464 | 1.49E-02 | FILIP1    | -1.932624431 | 4.91E-03 |
| ABHD14A     | 1.256544268 | 6.22E-03 | PKHD1     | -1.931670246 | 1.12E-04 |
| MIDN        | 1.253965651 | 3.75E-02 | FAT4      | -1.926946684 | 3.38E-03 |
| RBKS        | 1.252263881 | 4.66E-02 | HMGA2     | -1.926560158 | 2.56E-02 |
| EDF1        | 1.249480207 | 7.16E-03 | TRHDE     | -1.924722399 | 2.17E-03 |
| NDUFS7      | 1.240677475 | 2.02E-02 | SLC22A2   | -1.922709389 | 4.59E-02 |
| EEF1D       | 1.23984491  | 3.90E-03 | TSBP1     | -1.919543593 | 2.64E-02 |
| MRPL14      | 1.239359959 | 5.69E-03 | RIMS1     | -1.919411151 | 1.67E-03 |
| MRPS24      | 1.238194192 | 3.45E-03 | CALCR     | -1.917771959 | 3.45E-02 |
| ZNHIT1      | 1.230366169 | 5.61E-03 | PTPRQ     | -1.915142088 | 4.08E-03 |
| ECI1        | 1.229884448 | 2.09E-02 | TMEM236   | -1.914714108 | 5.91E-03 |
| TMEM256     | 1.228310936 | 2.76E-02 | CNTN3     | -1.903534531 | 7.33E-03 |
| SIT1        | 1.227439543 | 3.58E-02 | PCDH17    | -1.899483078 | 4.45E-02 |
| RPS15A      | 1.227230932 | 2.56E-02 | ANO5      | -1.898768363 | 9.11E-04 |

|          |             |          |               |              |          |
|----------|-------------|----------|---------------|--------------|----------|
| COX5B    | 1.227171838 | 4.75E-03 | MYB           | -1.898212822 | 3.25E-03 |
| RABIF    | 1.227011563 | 1.98E-03 | ZFHX4         | -1.896247771 | 4.07E-03 |
| METTL26  | 1.225686399 | 1.27E-02 | STON1-GTF2A1L | -1.895118552 | 1.77E-03 |
| POLD4    | 1.224097983 | 2.98E-02 | SLC17A8       | -1.888587682 | 1.42E-02 |
| ATP5ME   | 1.221033864 | 2.01E-02 | PCDH11X       | -1.888292513 | 1.05E-02 |
| NTHL1    | 1.22047609  | 3.07E-02 | MUC19         | -1.88759616  | 2.69E-03 |
| NFKBIL1  | 1.220156424 | 9.23E-03 | CD36          | -1.887290172 | 1.05E-02 |
| MRPL34   | 1.219953886 | 3.08E-02 | COL5A1        | -1.886593421 | 1.26E-02 |
| NDUFA11  | 1.21831454  | 4.32E-02 | UGT2B15       | -1.8841084   | 1.36E-03 |
| PSMB10   | 1.218275939 | 1.26E-02 | C12orf40      | -1.878814906 | 3.29E-03 |
| EHD4     | 1.216630807 | 1.31E-02 | CCL20         | -1.876537878 | 3.99E-02 |
| SHISAL2A | 1.212967682 | 4.79E-02 | SPINK5        | -1.875784136 | 2.68E-02 |
| GZMM     | 1.212552345 | 9.14E-03 | DDX4          | -1.873486358 | 1.49E-02 |
| NCF1     | 1.208474841 | 2.16E-02 | ZNF804B       | -1.871826595 | 1.46E-02 |
| FKBP2    | 1.206878599 | 1.13E-02 | PKHD1L1       | -1.86986053  | 1.43E-03 |
| CHCHD5   | 1.204891606 | 1.79E-02 | ECT2          | -1.861898526 | 4.79E-03 |
| PPP1R35  | 1.204421366 | 7.04E-03 | ARFGEF3       | -1.861860317 | 2.56E-02 |
| USF1     | 1.202837624 | 1.09E-02 | SVEP1         | -1.860040337 | 9.78E-04 |
| RPL13A   | 1.201047247 | 1.05E-02 | KCTD3         | -1.855505586 | 1.86E-02 |
| MPG      | 1.197958365 | 2.70E-02 | WDR17         | -1.854851625 | 4.31E-02 |
| LAMTOR4  | 1.1966781   | 2.60E-03 | UBA1          | -1.827732124 | 1.26E-02 |
| S100A6   | 1.19544759  | 2.99E-02 | MEP1B         | -1.824568156 | 4.26E-02 |
| DOHH     | 1.194411499 | 2.41E-02 | CARD6         | -1.821214275 | 2.56E-02 |
| HLA-DPB1 | 1.191702973 | 1.83E-02 | GDA           | -1.820528853 | 3.40E-02 |
| TBCC     | 1.189692776 | 7.50E-03 | LIN7A         | -1.819929268 | 3.45E-02 |
| SLC25A42 | 1.188754834 | 7.14E-03 | MYBPC1        | -1.818746078 | 2.53E-03 |
| MRPL12   | 1.184232539 | 3.01E-02 | CWH43         | -1.812240385 | 2.85E-02 |
| GSTP1    | 1.183064971 | 2.86E-02 | CDH7          | -1.809068836 | 3.00E-02 |
| APRT     | 1.182730211 | 1.25E-02 | PRR27         | -1.806930353 | 4.97E-02 |
| POLR2F   | 1.179591673 | 2.95E-03 | PCLO          | -1.805043118 | 1.52E-03 |
| ENDOV    | 1.177989504 | 1.48E-02 | RGPD4         | -1.804024882 | 7.95E-03 |
| OPA3     | 1.176274587 | 1.65E-02 | CCDC168       | -1.799054993 | 6.51E-03 |
| RPL32    | 1.175860541 | 2.61E-02 | EYA4          | -1.789729626 | 3.25E-03 |
| NDUFS8   | 1.174785873 | 2.58E-02 | PPARG         | -1.783409909 | 4.39E-02 |
| FAU      | 1.174481733 | 2.95E-03 | HMCN1         | -1.780914065 | 7.91E-04 |
| HIST1H1C | 1.173729286 | 3.93E-02 | COL6A3        | -1.778281055 | 2.89E-03 |
| PDP2     | 1.170852985 | 3.51E-02 | CLNK          | -1.776316868 | 4.29E-02 |
| B3GALT4  | 1.170781408 | 4.72E-02 | FBN2          | -1.774574316 | 9.92E-04 |
| FMC1     | 1.170323332 | 3.90E-02 | LRP6          | -1.774522878 | 2.13E-02 |
| PAXX     | 1.163099124 | 3.60E-02 | PPARGC1A      | -1.767843066 | 2.48E-02 |
| C1orf35  | 1.158973997 | 2.56E-02 | PTPN20        | -1.764657236 | 9.70E-03 |
| RNF181   | 1.158462742 | 2.15E-02 | ZBBX          | -1.759950578 | 4.34E-02 |
| RPL18    | 1.155303507 | 1.47E-02 | CDH19         | -1.755321656 | 3.34E-02 |



|            |             |          |         |              |          |
|------------|-------------|----------|---------|--------------|----------|
| DUSP23     | 1.154829047 | 8.10E-03 | RELN    | -1.753975553 | 2.20E-03 |
| RPL24      | 1.149289016 | 2.56E-02 | COL24A1 | -1.744327216 | 4.95E-03 |
| TRMT112    | 1.142129217 | 3.88E-03 | GHR     | -1.744076109 | 3.56E-03 |
| RPL22      | 1.141283668 | 3.28E-02 | CLMN    | -1.737655297 | 3.07E-02 |
| IFI27L2    | 1.1409498   | 9.16E-03 | ADAM18  | -1.737050364 | 2.24E-02 |
| SNX12      | 1.140108147 | 2.21E-02 | PTPN21  | -1.731707253 | 1.23E-02 |
| TSTD1      | 1.133784051 | 1.24E-02 | BAAT    | -1.726630838 | 3.92E-02 |
| ARL2       | 1.132036863 | 3.68E-02 | SI      | -1.724776878 | 1.50E-02 |
| BCL7C      | 1.13146595  | 1.79E-02 | GRIA4   | -1.716497711 | 1.65E-02 |
| ITPA       | 1.127218073 | 1.73E-02 | KIT     | -1.715731323 | 2.51E-03 |
| ATP5F1D    | 1.126588964 | 3.31E-02 | ADAM32  | -1.712138678 | 8.17E-03 |
| SHLD1      | 1.126394475 | 1.19E-02 | COL6A6  | -1.709030365 | 1.63E-02 |
| DDT        | 1.125751997 | 1.81E-02 | ADGRV1  | -1.707479351 | 1.82E-03 |
| ZBTB4      | 1.124290436 | 3.41E-02 | RACGAP1 | -1.707324226 | 2.02E-02 |
| COX17      | 1.124026001 | 2.89E-02 | TACR3   | -1.706914001 | 3.26E-02 |
| AC008764.4 | 1.121851959 | 4.56E-03 | GRIN2A  | -1.706639122 | 2.01E-02 |
| TMEM9      | 1.120221484 | 3.68E-02 | LPCAT2  | -1.705926493 | 2.56E-02 |
| GTSF1      | 1.119787825 | 4.77E-02 | SEMA3D  | -1.705328778 | 1.49E-02 |
| FXN        | 1.111169555 | 4.43E-02 | XIRP2   | -1.704026004 | 2.76E-02 |
| BID        | 1.109943351 | 5.68E-03 | ADGRL2  | -1.701983354 | 3.25E-03 |
| NDRG1      | 1.108912408 | 1.73E-02 | MERTK   | -1.697969218 | 3.10E-02 |
| DHRS4L2    | 1.108589525 | 1.43E-03 | DCHS2   | -1.691878032 | 1.27E-02 |
| CCS        | 1.107626916 | 2.20E-03 | CPED1   | -1.691761982 | 7.50E-03 |
| RPP21      | 1.106540193 | 2.51E-03 | MOXD1   | -1.688042892 | 2.51E-02 |
| C4orf3     | 1.102270411 | 5.80E-03 | ST3GAL6 | -1.687797564 | 2.78E-02 |
| UNK        | 1.100740939 | 2.64E-02 | DIO2    | -1.684771701 | 3.19E-02 |
| TFPT       | 1.099664457 | 2.36E-02 | DNAH5   | -1.682561237 | 1.81E-02 |
| TMSB4X     | 1.09886496  | 1.83E-02 | TICRR   | -1.675285975 | 1.62E-02 |
| RPL37A     | 1.098093527 | 1.63E-02 | ZNF521  | -1.67458852  | 3.21E-02 |
| NMNAT1     | 1.092672906 | 4.47E-02 | TBXAS1  | -1.670609211 | 4.49E-02 |
| COA3       | 1.091468227 | 2.90E-02 | CMYA5   | -1.669795437 | 7.95E-03 |
| MAST3      | 1.086848239 | 3.59E-02 | CSMD3   | -1.669146019 | 5.68E-03 |
| DIP2C      | 1.086491008 | 4.71E-02 | CDON    | -1.665573643 | 1.51E-03 |
| CIAO2B     | 1.08518535  | 2.75E-02 | CNTNAP4 | -1.661572721 | 1.02E-02 |
| UPP1       | 1.083974291 | 4.33E-02 | FREM2   | -1.661229947 | 2.41E-02 |
| FBXO32     | 1.081325398 | 3.59E-02 | ABCA9   | -1.660941617 | 3.68E-02 |
| RPL18A     | 1.08073951  | 2.19E-02 | DAB2    | -1.653848883 | 3.99E-02 |
| UBA52      | 1.077539365 | 2.41E-02 | DEPDC1  | -1.653665258 | 3.04E-02 |
| SPSB2      | 1.075902081 | 4.34E-02 | NPIP8   | -1.642589541 | 4.19E-03 |
| TIMM29     | 1.075211985 | 4.55E-02 | BMPER   | -1.639134085 | 5.97E-03 |
| DUSP2      | 1.07458374  | 1.40E-02 | ADGRG6  | -1.637455929 | 2.19E-02 |
| ARL6IP4    | 1.074510525 | 3.33E-02 | CFTR    | -1.634089332 | 1.82E-03 |
| NDUFS6     | 1.072367916 | 3.99E-02 | VLDLR   | -1.632488033 | 2.02E-02 |

|            |             |          |          |              |          |
|------------|-------------|----------|----------|--------------|----------|
| NMRAL1     | 1.070556416 | 5.68E-03 | HECTD2   | -1.631783403 | 3.69E-02 |
| TMEM205    | 1.069893328 | 3.03E-02 | RP1      | -1.630595286 | 1.73E-02 |
| RGS19      | 1.065640309 | 4.75E-02 | PCDH15   | -1.629615339 | 2.26E-03 |
| S100A10    | 1.057400498 | 2.11E-02 | PKP2     | -1.629412505 | 4.78E-03 |
| D2HGDH     | 1.056758172 | 4.01E-02 | MYO1H    | -1.628993712 | 1.89E-02 |
| MRPL55     | 1.055050987 | 1.92E-02 | ZNF724   | -1.623929427 | 3.73E-02 |
| RPL26      | 1.055022038 | 3.03E-02 | PTPN13   | -1.623210151 | 2.72E-03 |
| RHOF       | 1.054134863 | 4.43E-02 | NTNG1    | -1.612416511 | 1.77E-02 |
| RPL14      | 1.053740123 | 2.26E-03 | PPFIA2   | -1.606025093 | 2.80E-02 |
| RPL36AL    | 1.051693685 | 4.43E-02 | SCN11A   | -1.602522356 | 3.19E-02 |
| ATP5IF1    | 1.051144531 | 4.14E-02 | COL6A5   | -1.598410266 | 1.43E-02 |
| DYNLL2     | 1.049207038 | 2.55E-02 | HCN1     | -1.592761531 | 2.54E-02 |
| TMEM141    | 1.048481803 | 3.67E-02 | PIAS3    | -1.592707612 | 1.73E-02 |
| CD52       | 1.046090748 | 4.70E-02 | SEMA3E   | -1.590201567 | 1.65E-02 |
| DEF8       | 1.04579128  | 2.10E-02 | CR1L     | -1.589248042 | 4.88E-02 |
| RPS17      | 1.042277629 | 2.77E-02 | SLC5A11  | -1.588517246 | 4.97E-02 |
| CCDC12     | 1.041380839 | 3.10E-02 | IMPG2    | -1.579007716 | 3.02E-02 |
| USE1       | 1.040267123 | 2.07E-02 | KCNH8    | -1.574735692 | 3.56E-03 |
| RPS27      | 1.039164833 | 2.30E-02 | KCNH5    | -1.570333126 | 9.91E-03 |
| HSD17B8    | 1.031669319 | 3.81E-02 | CTTNBP2  | -1.56463394  | 3.40E-02 |
| GATD1      | 1.030959931 | 3.52E-03 | CDH9     | -1.563872555 | 3.01E-02 |
| CHCHD10    | 1.029141115 | 3.01E-02 | SEMA5A   | -1.562218608 | 1.65E-02 |
| AC008770.4 | 1.028047099 | 3.99E-02 | ATP13A5  | -1.560491736 | 4.51E-02 |
| MRPS18A    | 1.026226747 | 4.82E-02 | CNTN1    | -1.558712696 | 1.96E-02 |
| UXT        | 1.024579828 | 4.34E-02 | POTEJ    | -1.552782229 | 1.86E-02 |
| C2orf68    | 1.024444255 | 2.71E-02 | LAMA3    | -1.551867892 | 7.75E-03 |
| SDF2L1     | 1.024378511 | 4.88E-02 | COL1A2   | -1.535319308 | 8.28E-03 |
| FAM173A    | 1.024177663 | 3.04E-02 | COL19A1  | -1.532476295 | 2.57E-02 |
| PAFAH1B3   | 1.02193331  | 4.14E-02 | CLCN5    | -1.527557687 | 5.80E-03 |
| GDF11      | 1.020899905 | 4.79E-02 | CRB1     | -1.527248793 | 3.04E-03 |
| RPL38      | 1.018457925 | 2.09E-02 | RGS6     | -1.526132209 | 1.10E-02 |
| COX4I1     | 1.01836853  | 2.61E-02 | WDR49    | -1.522670167 | 3.99E-02 |
| VAMP8      | 1.014464498 | 2.12E-02 | CCNG2    | -1.511145965 | 6.09E-03 |
| EIF3G      | 1.013957033 | 2.33E-02 | NRCAM    | -1.50819234  | 3.59E-02 |
| MRPL22     | 1.01309664  | 2.02E-02 | C4A      | -1.507972668 | 2.97E-02 |
| NDUFAF3    | 1.008849761 | 2.84E-02 | SCN1A    | -1.507143022 | 3.55E-02 |
| LYRM2      | 1.00884237  | 2.85E-02 | FAM20A   | -1.502564826 | 4.60E-02 |
| RPL19      | 1.006428694 | 4.88E-02 | IL1R1    | -1.501194007 | 3.97E-02 |
| RBM14-RBM4 | 1.005427903 | 3.21E-02 | ANKRD30B | -1.499532662 | 2.58E-02 |
| ADI1       | 1.002413837 | 3.67E-02 | STIL     | -1.491618061 | 2.10E-02 |
| IFT43      | 1.002342853 | 4.19E-03 | COL4A3   | -1.490250867 | 1.49E-02 |
| SERF2      | 1.001564064 | 1.10E-02 | LMNTD1   | -1.485983928 | 3.99E-02 |
| CCDC107    | 1.001275507 | 3.46E-02 | WDFY3    | -1.485592658 | 4.66E-03 |

|            |              |          |         |              |          |
|------------|--------------|----------|---------|--------------|----------|
| RPL27A     | 1.000568164  | 4.79E-02 | SLC35A4 | -1.481115495 | 4.26E-02 |
| TRIM43     | -7.229355156 | 2.12E-06 | CNTN6   | -1.47875727  | 1.45E-02 |
| SPDYE15    | -7.126122646 | 2.55E-02 | NEB     | -1.478206822 | 5.48E-03 |
| CT45A3     | -6.84663301  | 1.11E-09 | FREM1   | -1.475802784 | 4.08E-02 |
| SPDYE15    | -6.292009684 | 1.72E-02 | DMXL2   | -1.475235427 | 7.00E-03 |
| CT45A1     | -6.235688056 | 2.25E-04 | PDE11A  | -1.468579611 | 4.79E-02 |
| UGT1A7     | -6.085844647 | 3.01E-05 | LEPR    | -1.467447459 | 1.21E-02 |
| TRIM49C    | -6.080092592 | 4.80E-08 | KCNMA1  | -1.466471167 | 1.81E-02 |
| IFNA8      | -5.74607382  | 5.58E-04 | NBPF3   | -1.465480257 | 2.92E-02 |
| SPDYE13    | -5.447788692 | 2.15E-03 | CENPI   | -1.461494049 | 4.70E-02 |
| PRPS1L1    | -5.425681781 | 6.65E-04 | PPP1R9A | -1.457146302 | 1.22E-02 |
| GYS2       | -5.305214097 | 2.27E-02 | ADAM12  | -1.452091497 | 2.82E-02 |
| PENK       | -5.253028195 | 8.66E-04 | C2CD6   | -1.451331197 | 2.04E-02 |
| LIPF       | -5.132335318 | 4.10E-04 | ZNF93   | -1.449146021 | 1.07E-02 |
| XAGE1B     | -5.125195206 | 4.08E-03 | ERBB4   | -1.447793752 | 5.69E-03 |
| IL12B      | -5.099158387 | 1.08E-02 | MUC16   | -1.447762291 | 2.95E-02 |
| UGT1A9     | -5.086180075 | 1.29E-03 | TEAD1   | -1.440483358 | 4.88E-02 |
| TEX13C     | -5.018872139 | 2.82E-02 | PROSER1 | -1.436621836 | 3.01E-02 |
| USP17L17   | -5.016777378 | 1.48E-02 | LMF2    | -1.434781275 | 4.41E-02 |
| SULT1E1    | -5.009355214 | 3.56E-03 | ZNF90   | -1.430354331 | 2.11E-02 |
| TBX22      | -4.906552739 | 1.09E-03 | DNAH6   | -1.429224812 | 5.49E-03 |
| HSD3B2     | -4.88718085  | 4.03E-03 | ZFP69   | -1.428375256 | 4.61E-02 |
| NMUR2      | -4.887072601 | 1.10E-03 | CIP2A   | -1.410666487 | 2.11E-02 |
| OR5AK2     | -4.886947837 | 1.04E-03 | DBN1    | -1.408986018 | 1.48E-02 |
| OR5M10     | -4.858224471 | 4.17E-03 | GLI3    | -1.40759042  | 4.14E-02 |
| PRAMEF9    | -4.766044287 | 5.38E-03 | RIMS2   | -1.406365133 | 4.79E-02 |
| PRR23D2    | -4.759865838 | 1.71E-03 | SLC44A5 | -1.399264054 | 4.37E-02 |
| MBD3L4     | -4.759441769 | 5.06E-03 | ANK2    | -1.395888526 | 3.68E-02 |
| OR5A1      | -4.638438909 | 4.54E-03 | SGSH    | -1.395320424 | 3.86E-02 |
| NOX5       | -4.607230414 | 4.70E-02 | RGPD2   | -1.395104914 | 4.17E-02 |
| Z83844.1   | -4.593599361 | 1.77E-14 | NAALAD2 | -1.394352412 | 4.14E-02 |
| MBD3L3     | -4.586683234 | 2.58E-02 | DSC2    | -1.389268568 | 3.28E-02 |
| SSX1       | -4.500844737 | 2.73E-03 | EPHA6   | -1.384195934 | 3.27E-02 |
| CCDC160    | -4.466943865 | 3.59E-02 | ANK1    | -1.378029991 | 1.07E-02 |
| DEFB105A   | -4.452288795 | 1.89E-02 | DTNA    | -1.367372735 | 1.50E-02 |
| TBC1D3I    | -4.439278051 | 3.34E-02 | CCDC150 | -1.36483974  | 2.98E-02 |
| PPBP       | -4.434793764 | 8.99E-04 | PDZRN4  | -1.361544204 | 2.82E-02 |
| SLC2A2     | -4.410349296 | 3.04E-02 | NBEA    | -1.3565313   | 2.20E-02 |
| RFPL4A     | -4.407000386 | 3.26E-04 | MAOA    | -1.343116991 | 3.86E-02 |
| IFNA10     | -4.359861653 | 6.22E-03 | BRIP1   | -1.341945765 | 3.01E-02 |
| KLHL14     | -4.353758442 | 1.84E-02 | ABCA12  | -1.341300886 | 2.01E-02 |
| GCM2       | -4.349747617 | 3.10E-02 | NAV3    | -1.334399311 | 1.64E-02 |
| AL445989.1 | -4.348822986 | 6.29E-04 | N4BP2   | -1.326037224 | 1.77E-02 |

|            |              |          |            |              |          |
|------------|--------------|----------|------------|--------------|----------|
| IL9        | -4.308526183 | 2.46E-02 | DCC        | -1.321434925 | 3.28E-02 |
| PCDHB7     | -4.294210444 | 4.25E-02 | ANLN       | -1.321301776 | 4.95E-02 |
| ALX1       | -4.28693484  | 1.10E-02 | ZNF404     | -1.319975368 | 2.38E-02 |
| DMP1       | -4.285291218 | 1.40E-04 | RANBP2     | -1.318138354 | 3.59E-02 |
| CABS1      | -4.201946494 | 2.57E-02 | PIEZO2     | -1.303796563 | 4.63E-02 |
| OR4K1      | -4.18995185  | 3.40E-03 | LAYN       | -1.300888055 | 4.40E-02 |
| GOLGA6L22  | -4.170138563 | 1.08E-05 | RGPD3      | -1.300778308 | 4.78E-03 |
| OR5T3      | -4.153839583 | 1.48E-02 | DCDC1      | -1.298035211 | 3.04E-02 |
| TEX50      | -4.131400102 | 2.32E-02 | AHI1       | -1.287367775 | 3.56E-02 |
| ZNF705D    | -4.123760819 | 8.29E-05 | MYO16      | -1.286718387 | 2.49E-02 |
| AC127029.3 | -4.06546557  | 1.14E-02 | DDR2       | -1.279464514 | 4.17E-02 |
| GLYATL3    | -4.050549943 | 4.70E-02 | SCYL2      | -1.272448291 | 1.32E-02 |
| OR5I1      | -4.046611317 | 1.54E-02 | GRAMD2B    | -1.26748115  | 3.17E-02 |
| AL590132.1 | -4.009274075 | 9.57E-03 | ZNF574     | -1.261030929 | 4.27E-02 |
| F9         | -3.98311911  | 2.34E-02 | ADGRB3     | -1.257304138 | 4.66E-02 |
| KRTAP19-1  | -3.982019556 | 3.03E-02 | UBAP2L     | -1.255930378 | 1.62E-02 |
| OR11G2     | -3.968955196 | 6.12E-03 | ROBO1      | -1.236616564 | 4.34E-02 |
| LGALS9B    | -3.966394818 | 4.16E-02 | LRP1B      | -1.236392997 | 2.54E-02 |
| MS4A3      | -3.960423764 | 1.44E-02 | TCF4       | -1.235892399 | 2.09E-02 |
| TRIM64     | -3.954520095 | 5.55E-03 | HDAC9      | -1.221266176 | 1.76E-02 |
| UGT2A2     | -3.940979013 | 4.79E-03 | COPG2      | -1.200820446 | 1.83E-02 |
| UGT2B10    | -3.924616308 | 1.53E-05 | RANBP17    | -1.1975752   | 3.88E-02 |
| LMO3       | -3.901175511 | 1.81E-02 | VPS52      | -1.187480928 | 4.98E-02 |
| NBPF4      | -3.895847222 | 1.23E-05 | NRXN1      | -1.176335221 | 3.38E-02 |
| CLCA1      | -3.88243496  | 4.43E-04 | AF241726.2 | -1.174213625 | 3.43E-02 |
| CDY1       | -3.860625872 | 3.43E-02 | LMBRD2     | -1.167158788 | 3.04E-02 |
| IL17A      | -3.843372911 | 4.27E-02 | COL4A4     | -1.16322357  | 4.89E-02 |
| OR4K5      | -3.839833553 | 8.26E-03 | DGKA       | -1.157743057 | 4.59E-02 |
| OR11H12    | -3.828525267 | 7.91E-04 | PARBP      | -1.146389993 | 4.98E-02 |
| GOLGA6C    | -3.82809646  | 5.94E-05 | LIG4       | -1.140317653 | 2.92E-02 |
| GPR179     | -3.822154449 | 4.70E-02 | NBPF1      | -1.121654236 | 2.66E-02 |
| ZNF728     | -3.812233935 | 4.80E-08 | ESYT1      | -1.120573543 | 2.51E-02 |
| HRNR       | -3.769676743 | 5.94E-05 | SMC4       | -1.104742398 | 4.51E-02 |
| OR4F5      | -3.766077376 | 6.47E-04 | PPME1      | -1.0847579   | 2.07E-02 |
| RGS4       | -3.765720957 | 1.10E-02 | CNTNAP2    | -1.072791827 | 4.25E-02 |
| UCP1       | -3.754600965 | 5.90E-04 | HACE1      | -1.063311919 | 3.99E-02 |
|            |              |          | ZNF518B    | -1.023022831 | 4.68E-02 |
