# Supplementary material
Source: PubMed Central journal article supplement (PMC10992610)
Supplement: 262_2021_2879_MOESM5_ESM.pdf [file 262_2021_2879_MOESM5_ESM.pdf]

**Supplementary Table 2**

| Cluster | adj.Pval | nGenes | Pathways                                                                           |
|---------|----------|--------|------------------------------------------------------------------------------------|
| A       | 9.31E-09 | 133    | Anatomical structure morphogenesis                                                 |
| A       | 1.40E-08 | 117    | System process                                                                     |
| A       | 3.14E-07 | 38     | Regulation of membrane potential                                                   |
| A       | 1.46E-06 | 177    | Cell differentiation                                                               |
| A       | 2.42E-06 | 112    | Nervous system development                                                         |
| A       | 2.42E-06 | 182    | Cellular developmental process                                                     |
| A       | 2.42E-06 | 82     | Nervous system process                                                             |
| A       | 2.45E-06 | 62     | Circulatory system development                                                     |
| A       | 3.19E-06 | 84     | Neurogenesis                                                                       |
| A       | 5.78E-06 | 78     | Cell adhesion                                                                      |
| A       | 3.10E-05 | 60     | Sensory perception                                                                 |
| A       | 4.84E-05 | 76     | Generation of neurons                                                              |
| A       | 5.99E-05 | 6      | Protein deubiquitination involved in ubiquitin-dependent protein catabolic process |
| A       | 7.70E-05 | 16     | Action potential                                                                   |
| B       | 1.39E-32 | 35     | SRP-dependent cotranslational protein targeting to membrane                        |
| B       | 7.29E-26 | 39     | Viral gene expression                                                              |
| B       | 7.29E-26 | 38     | Viral transcription                                                                |
| B       | 1.78E-24 | 37     | Translational initiation                                                           |
| B       | 1.54E-23 | 36     | Protein targeting to membrane                                                      |
| B       | 5.51E-23 | 44     | Establishment of protein localization to membrane                                  |
| B       | 3.21E-22 | 37     | Nuclear-transcribed mRNA catabolic process                                         |
| B       | 4.63E-21 | 58     | Translation                                                                        |
| B       | 8.86E-20 | 63     | Amide biosynthetic process                                                         |
