# Supplementary material
Source: PubMed Central journal article supplement (PMC10992610)
Supplement: 262_2021_2879_MOESM8_ESM.pdf [file 262_2021_2879_MOESM8_ESM.pdf]

**Supplementary Table 5**

| <b>History of Colon Polyps</b>           |                             | <b>Lymphatic Invasion</b>                |                              |
|------------------------------------------|-----------------------------|------------------------------------------|------------------------------|
| <b>Upregulated gene (Welch's t-test)</b> |                             | <b>Upregulated gene (Welch's t-test)</b> |                              |
| <i>ATP5D</i>                             | p = 0.008761 (t = -2.642)   | <i>ATP5D</i>                             | p = 0.02018 (t = -2.333)     |
| <i>NDUFB7</i>                            | p = 0.01741 (t = -2.395)    | <i>NDUFB7</i>                            | p = 0.04094 (t = -2.051)     |
| <i>LGALS1</i>                            | p = 0.0003472 (t = -3.619)  | <i>LGALS1</i>                            | p = 0.00005453 (t = -4.081)  |
| <i>DUSP1</i>                             | p = 0.02069 (t = -2.324)    | <i>ALKBH7</i>                            | p = 0.01254 (t = -2.507)     |
| <i>HIST1H4F</i>                          | p = 0.02251 (t = -2.294)    | <i>ARL2</i>                              | p = 0.0002487 (t = -3.695)   |
| <i>ALKBH7</i>                            | p = 0.01262 (t = -2.512)    | <i>RRAS</i>                              | p = 0.000001533 (t = -4.876) |
| <i>RRAS</i>                              | p = 0.009622 (t = -2.608)   | <i>PYCARD</i>                            | p = 0.003872 (t = -2.906)    |
| <i>PYCARD</i>                            | p = 0.01688 (t = -2.404)    | <i>RPS16</i>                             | p = 0.03848 (t = -2.077)     |
| <i>RPS16</i>                             | p = 0.02638 (t = -2.233)    | <i>COX5B</i>                             | p = 0.006171 (t = -2.755)    |
| <i>MRPL34</i>                            | p = 0.01695 (t = -2.402)    | <i>BLVRB</i>                             | p = 0.02553 (t = -2.242)     |
| <i>COX5B</i>                             | p = 0.0002632 (t = -3.696)  | <i>GZMM</i>                              | p = 0.002114 (t = -3.091)    |
| <i>BLVRB</i>                             | p = 0.01096 (t = -2.563)    | <i>RHOB</i>                              | p = 0.006382 (t = -2.742)    |
| <i>GZMM</i>                              | p = 0.01030 (t = -2.582)    | <i>DUSP2</i>                             | p = 0.04592 (t = -2.003)     |
| <i>NCF1</i>                              | p = 0.00007786 (t = -3.995) | <i>NCF1</i>                              | p = 0.03896 (t = -2.071)     |
| <i>IL17RC</i>                            | p = 0.004565 (t = -2.858)   | <i>CYGB</i>                              | p = 0.0003295 (t = -3.621)   |
| <i>RBKS</i>                              | p = 0.006910 (t = -2.720)   | <i>IL17RC</i>                            | p = 0.005414 (t = -2.795)    |
| <i>CCDC85B</i>                           | p = 0.01526 (t = -2.443)    | <i>MIDN</i>                              | p = 0.01670 (t = -2.404)     |
| <i>NDUFS8</i>                            | p = 0.04272 (t = -2.037)    | <i>ZNHIT1</i>                            | p = 0.004351 (t = -2.869)    |
| <i>POLR2L</i>                            | p = 0.008055 (t = -2.671)   | <i>ATP5I</i>                             | p = 0.007230 (t = 2.700)     |
| <i>PGP</i>                               | p = 0.02509 (t = -2.252)    | <i>RPL13</i>                             | p = 0.001357 (t = -3.228)    |
| <i>MRPL54</i>                            | p = 0.0009547 (t = -3.340)  | <i>CCDC85B</i>                           | p = 5.297e-8 (t = -5.550)    |
| <i>ADI1</i>                              | p = 0.001932 (t = -3.129)   | <i>NDUFS8</i>                            | p = 0.0005934 (t = -3.462)   |
| <i>HIST1H1C</i>                          | p = 0.04972 (t = -1.970)    | <i>NDUFAF3</i>                           | p = 0.001719 (t = -3.157)    |
| <i>IER5</i>                              | p = 0.01436 (t = -2.460)    | <i>POLR2L</i>                            | p = 0.007694 (t = -2.679)    |
| <i>MRPL41</i>                            | p = 0.009624 (t = -2.608)   | <i>S1PR5</i>                             | p = 0.001949 (t = -3.118)    |
| <i>TBCC</i>                              | p = 0.03225 (t = -2.152)    | <i>PGP</i>                               | p = 0.0001694 (t = -3.800)   |
| <i>ROMO1</i>                             | p = 0.01328 (t = -2.494)    | <i>RPS19BP1</i>                          | p = 0.02745 (t = -2.213)     |
| <i>CTNNBIP1</i>                          | p = 0.02142 (t = -2.313)    | <i>NENF</i>                              | p = 0.001125 (t = -3.283)    |
| <i>NUDT2</i>                             | p = 0.001386 (t = -3.230)   | <i>IER5</i>                              | p = 0.08786 (t = -1.711)     |
| <i>RGS19</i>                             | p = 0.00003330 (t = -4.203) | <i>MRPL41</i>                            | p = 0.0006447 (t = -3.440)   |
| <i>MRPS12</i>                            | p = 0.04348 (t = -2.030)    | <i>ROMO1</i>                             | p = 0.02316 (t = -2.281)     |
| <i>RPS14</i>                             | p = 0.001696 (t = -3.173)   | <i>HSD17B8</i>                           | p = 0.006144 (t = -2.755)    |
| <i>UBA52</i>                             | p = 0.007980 (t = -2.674)   | <i>RGCC</i>                              | p = 0.00006557 (t = -4.044)  |
| <i>B3GALT4</i>                           | p = 0.005100 (t = -2.824)   | <i>BCL7C</i>                             | p = 0.0003594 (t = -3.602)   |
| <i>NDRG1</i>                             | p = 0.01233 (t = -2.516)    | <i>RGS19</i>                             | p = 0.000008744 (t = -4.502) |
| <i>GAS7</i>                              | p = 0.03458 (t = -2.121)    | <i>NUDT1</i>                             | p = 0.02110 (t = -2.316)     |
| <i>HLA-DPB1</i>                          | p = 0.00001496 (t = -4.386) | <i>GSTP1</i>                             | p = 0.0003730 (t = -3.590)   |
| <i>CDKN2A</i>                            | p = 0.006707 (t = -2.729)   | <i>MRPS12</i>                            | p = 0.03481 (t = -2.118)     |
| <i>MRPL22</i>                            | p = 0.004322 (t = -2.877)   | <i>UBA52</i>                             | p = 0.01902 (t = -2.356)     |

|                 |                            |                 |                              |
|-----------------|----------------------------|-----------------|------------------------------|
| <i>COX14</i>    | p = 0.04235 (t = -2.040)   | <i>B3GALT4</i>  | p = 0.000001071 (t = -4.948) |
| <i>FAM229A</i>  | p = 0.01731 (t = -2.391)   | <i>MRPL55</i>   | p = 0.0003859 (t = -3.581)   |
| <i>COX4I1</i>   | p = 0.01396 (t = -2.475)   | <i>GAS7</i>     | p = 0.01503 (t = -2.442)     |
| <i>OST4</i>     | p = 0.04177 (t = -2.046)   | <i>HLA-DPB1</i> | p = 0.01871 (t = -2.361)     |
| <i>IER2</i>     | p = 0.02203 (t = 2.301)    | <i>CDKN2A</i>   | p = 5.323e-7 (t = -5.114)    |
| <i>RPS15</i>    | p = 0.009488 (t = -2.613)  | <i>H2AFX</i>    | p = 0.01442 (t = -2.459)     |
| <i>TNFSF14</i>  | p = 0.001725 (t = -3.164)  | <i>FAU</i>      | p = 0.04106 (t = -2.049)     |
| <i>DEDD2</i>    | p = 0.004458 (t = -2.868)  | <i>CCS</i>      | p = 0.01706 (t = -2.395)     |
| <i>RPS5</i>     | p = 0.002912 (t = -3.007)  | <i>C16orf13</i> | p = 0.0002567 (t = -3.692)   |
| <i>HIST1H4A</i> | p = 0.001508 (t = -3.200)  | <i>RPL18</i>    | p = 0.04076 (t = -2.053)     |
| <i>PSMB10</i>   | p = 0.02144 (t = -2.314)   | <i>FAM173A</i>  | p = 0.00001668 (t = -4.353)  |
| <i>BID</i>      | p = 0.002618 (t = -3.036)  | <i>METRN</i>    | p = 0.00002709 (t = -4.244)  |
| <i>MGMT</i>     | p = 0.02294 (t = -2.284)   | <i>FAM229A</i>  | p = 0.00006615 (t = -4.033)  |
| <i>ISG15</i>    | p = 0.005966 (t = -2.768)  | <i>NMRAL1</i>   | p = 0.01516 (t = -2.441)     |
| <i>DUSP23</i>   | p = 0.01711 (t = -2.399)   | <i>RPS15</i>    | p = 0.0008468 (t = -3.364)   |
| <i>USF1</i>     | p = 0.009039 (t = -2.629)  | <i>DEDD2</i>    | p = 0.00005709 (t = -4.070)  |
| <i>CYBA</i>     | p = 0.01251 (t = -2.514)   | <i>POMC</i>     | p = 0.00009793 (t = -3.930)  |
| <i>CHCHD10</i>  | p = 0.005235 (t = -2.813)  | <i>TIMP1</i>    | p = 0.0008349 (t = -3.367)   |
| <i>PTGDS</i>    | p = 0.0003523 (t = -3.608) | <i>ISG15</i>    | p = 0.01063 (t = -2.566)     |
| <i>VAMP8</i>    | p = 0.004517 (t = -2.862)  | <i>LMNA</i>     | p = 0.002244 (t = -3.075)    |
|                 |                            | <i>DUSP23</i>   | p = 0.0001803 (t = -3.780)   |
|                 |                            | <i>BAD</i>      | p = 0.009221 (t = -2.615)    |
|                 |                            | <i>USF1</i>     | p = 0.04604 (t = -2.002)     |
|                 |                            | <i>CYBA</i>     | p = 0.00004542 (t = -4.124)  |
|                 |                            | <i>PTGDS</i>    | p = 0.0006944 (t = -3.418)   |
|                 |                            | <i>MZT2A</i>    | p = 0.01733 (t = -2.390)     |
|                 |                            | <i>MRPL23</i>   | p = 0.04321 (t = -2.028)     |

| <u>Venous Invasion</u>            |                             | <u>Perineural Invasion</u>        |                            |
|-----------------------------------|-----------------------------|-----------------------------------|----------------------------|
| Upregulated gene (Welch's t-test) |                             | Upregulated gene (Welch's t-test) |                            |
| <i>LGALS1</i>                     | p = 0.02267 (t = -2.298)    | <i>LGALS1</i>                     | p = 0.008940 (t = -2.665)  |
| <i>RRAS</i>                       | p = 0.02376 (t = -2.278)    | <i>RRAS</i>                       | p = 0.005212 (t = -2.856)  |
| <i>RHOB</i>                       | p = 0.04482 (t = -2.020)    | <i>NCF1</i>                       | p = 0.03180 (t = -2.176)   |
| <i>CCDC85B</i>                    | p = 0.02581 (t = -2.246)    | <i>CYGB</i>                       | p = 0.001502 (t = -3.255)  |
| <i>HSPA1A</i>                     | p = 0.02088 (t = -2.332)    | <i>MIDN</i>                       | p = 0.01933 (t = -2.387)   |
| <i>RGCC</i>                       | p = 0.001025 (t = -3.349)   | <i>S1PR1</i>                      | p = 0.01450 (t = -2.495)   |
| <i>RGS19</i>                      | p = 0.006473 (t = -2.749)   | <i>HSPA6</i>                      | p = 0.02136 (t = -2.331)   |
| <i>B3GALT4</i>                    | p = 0.007104 (t = -2.714)   | <i>IER5</i>                       | p = 0.04778 (t = -2.010)   |
| <i>ICAM2</i>                      | p = 0.04636 (t = -2.005)    | <i>HSPA1A</i>                     | p = 0.03165 (t = -2.184)   |
| <i>CDKN2A</i>                     | p = 0.00001598 (t = -4.447) | <i>RGCC</i>                       | p = 0.04632 (t = -2.024)   |
| <i>TNFAIP8L1</i>                  | p = 0.01726 (t = -2.401)    | <i>RGS19</i>                      | p = 0.03460 (t = -2.143)   |
| <i>DDIT3</i>                      | p = 0.04088 (t = -2.060)    | <i>B3GALT4</i>                    | p = 0.0004633 (t = -3.596) |

|                  |                           |                 |                           |
|------------------|---------------------------|-----------------|---------------------------|
| <i>METRN</i>     | p = 0.001927 (t = -3.138) | <i>GAS7</i>     | p = 0.03466 (t = -2.146)  |
| <i>HIST3H2BB</i> | p = 0.02837 (t = -2.208)  | <i>ICAM2</i>    | p = 0.01568 (t = -2.455)  |
| <i>POMC</i>      | p = 0.004681 (t = -2.852) | <i>CDKN2A</i>   | p = 0.002403 (t = -3.140) |
| <i>RIC3</i>      | p = 0.01595 (t = -2.430)  | <i>HIST2H4A</i> | p = 0.001337 (t = -3.267) |
| <i>TIMP1</i>     | p = 0.002751 (t = -3.034) | <i>ISG15</i>    | p = 0.01872 (t = -2.394)  |
| <i>ISG15</i>     | p = 0.01678 (t = -2.413)  | <i>DIP2C</i>    | p = 0.03191 (t = -2.171)  |
| <i>LMNA</i>      | p = 0.008620 (t = -2.656) | <i>LMNA</i>     | p = 0.04627 (t = -2.023)  |
|                  |                           | <i>PTGDS</i>    | p = 0.01285 (t = -2.543)  |
